# Supplementary material for: Sequential hydrogenation of nitroaromatics to alicyclic amines via highly-dispersed Ru–Pd nanoparticles anchored on air-exfoliated C3N4 nanosheets
Source: Royal Society of Chemistry journal article supplement (doi:10.1039/d2ra07612h), 2023-01-01
Supplement: d2ra07612h1.pdf [file d2ra07612h1.pdf]

## Supporting information

### Sequential Hydrogenation of Nitroaromatics to Alicyclic Amines via Highly-dispersed Ru-Pd Nanoparticles Anchored on Air-exfoliated C<sub>3</sub>N<sub>4</sub> Nanosheets

Jiale Wu<sup>a,b,c</sup>, Liguang Wang<sup>a,b,c,e\*</sup>, Shuang Xu<sup>a</sup>, Yan Cao<sup>a</sup>, Ziqiang Han<sup>a</sup>, Huiquan Li<sup>a,b,c,d</sup>

<sup>a</sup>Key Laboratory of Green Process and Engineering, National Engineering Research Center of Green Recycling for Strategic Metal Resources, Institute of Process Engineering, Chinese Academy of Sciences, Beijing, 100190, China.

<sup>b</sup>Sino-Danish College, University of Chinese Academy of Sciences, Beijing, 100049, China.

<sup>c</sup>Sino-Danish center for Education and Research, University of Chinese Academy of Sciences, Beijing, 100049, China.

<sup>d</sup>School of Chemical Engineering, University of Chinese Academy of Sciences, Beijing, 100049, China

<sup>e</sup>Dalian National Laboratory for Clean Energy, Dalian, 116023, China

\*E-mail: [lgwang@ipe.ac.cn](mailto:lgwang@ipe.ac.cn)

#### Table of contents

|                                                 |
|-------------------------------------------------|
| <b>1 Catalyst characterization</b>              |
| <b>2 Catalyst evaluation</b>                    |
| <b>3 Hydrogenation mechanism</b>                |
| <b>4 Hydrogenation kinetics</b>                 |
| <b>5 Catalyst recyclability and versatility</b> |
| <b>Reference</b>                                |

## 1 Catalyst characterization

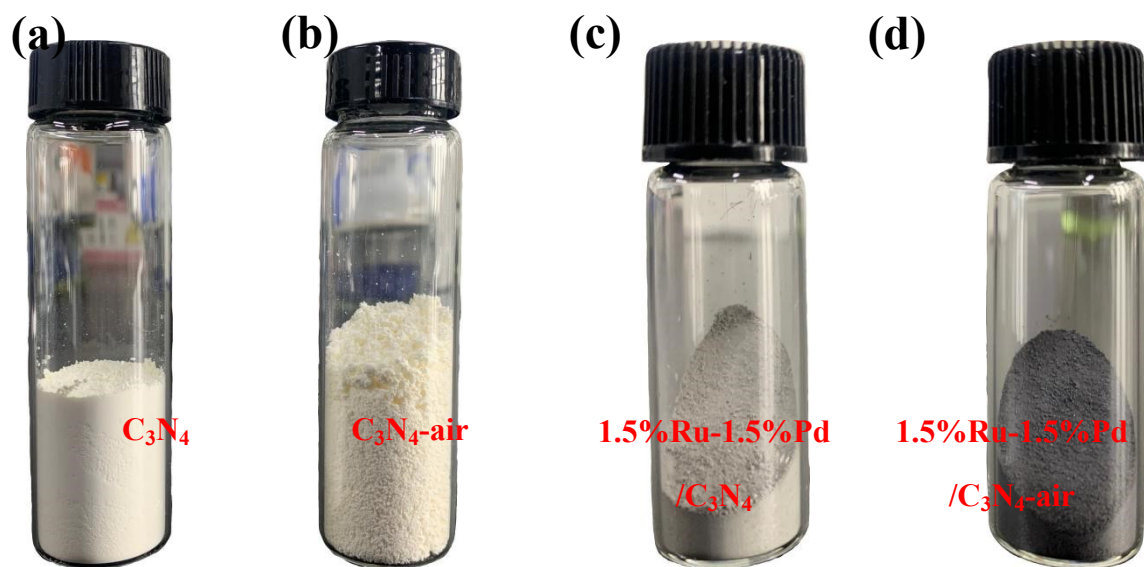

**Fig. S1.** Pictures of (a)  $C_3N_4$ , (b)  $C_3N_4$ -air, (c) 1.5%Ru-1.5%Pd/ $C_3N_4$ , (d) 1.5%Ru-1.5%Pd/ $C_3N_4$ -air.

**Table S1** Structural properties of Ru-Pd cascade catalysts and support, as well as corresponding performance of catalysts

| Catalyst                                         | Ru <sup>[a]</sup> | Pd <sup>[a]</sup> | S <sub>BET</sub> <sup>[b]</sup> | d <sub>pore</sub> <sup>[b]</sup> | V <sub>pore</sub> <sup>[b]</sup> | Conv. <sup>[c]</sup> | Sel. <sup>[c]</sup> |
|--------------------------------------------------|-------------------|-------------------|---------------------------------|----------------------------------|----------------------------------|----------------------|---------------------|
| 1.5%Ru-1.5%Pd/C <sub>3</sub> N <sub>4</sub> -air | 1.42              | 1.44              | 96.24                           | 9.68                             | 0.23                             | 100.0%               | 96.8%               |
| 1.5%Ru-1.5%Pd/C <sub>3</sub> N <sub>4</sub>      | 1.54              | 1.57              | 83.50                           | 22.38                            | 0.23                             | 100.0%               | 34.6%               |
| C <sub>3</sub> N <sub>4</sub> -air               | -                 | -                 | 137.22                          | 13.65                            | 0.47                             | -                    | -                   |
| C <sub>3</sub> N <sub>4</sub>                    | -                 | -                 | 85.48                           | 22.24                            | 0.48                             | -                    | -                   |
| 1.5%Ru-1.5%Pd/C                                  | 1.34              | 1.38              | 35.61                           | 4.36                             | 0.04                             | 100.0%               | 7.5%                |

[a] Ru/Pd loading (wt.%). Determined by ICP-OES.

[b] S<sub>BET</sub> (m<sup>2</sup>·g<sup>-1</sup>) was BET surface area; d<sub>pore</sub> (nm) and V<sub>pore</sub> (cm<sup>3</sup>·g<sup>-1</sup>) were average pore diameter and total pore volume. Determined by N<sub>2</sub> adsorption-desorption.

[c] Conversion of nitrobenzene; Selectivity of cyclohexylamine; Determined by GC.

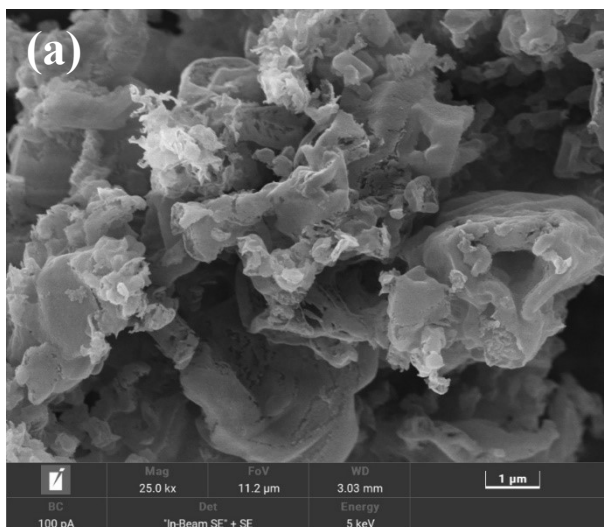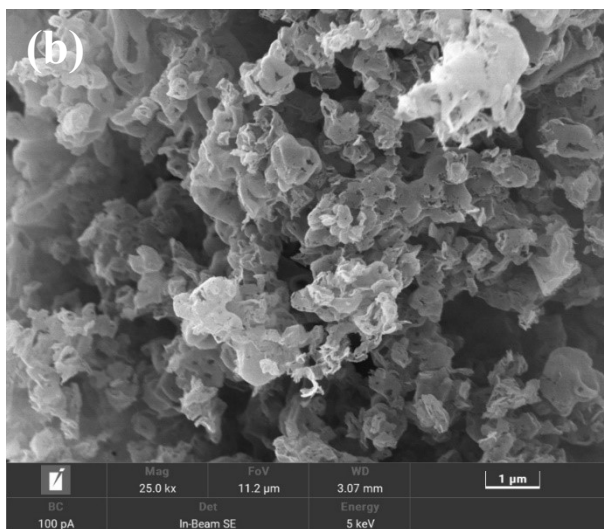

**Fig. S2.** SEM images. (a) 1.5%Ru-1.5%Pd/C<sub>3</sub>N<sub>4</sub>, (b)1.5%Ru-1.5%Pd/C<sub>3</sub>N<sub>4</sub>-air

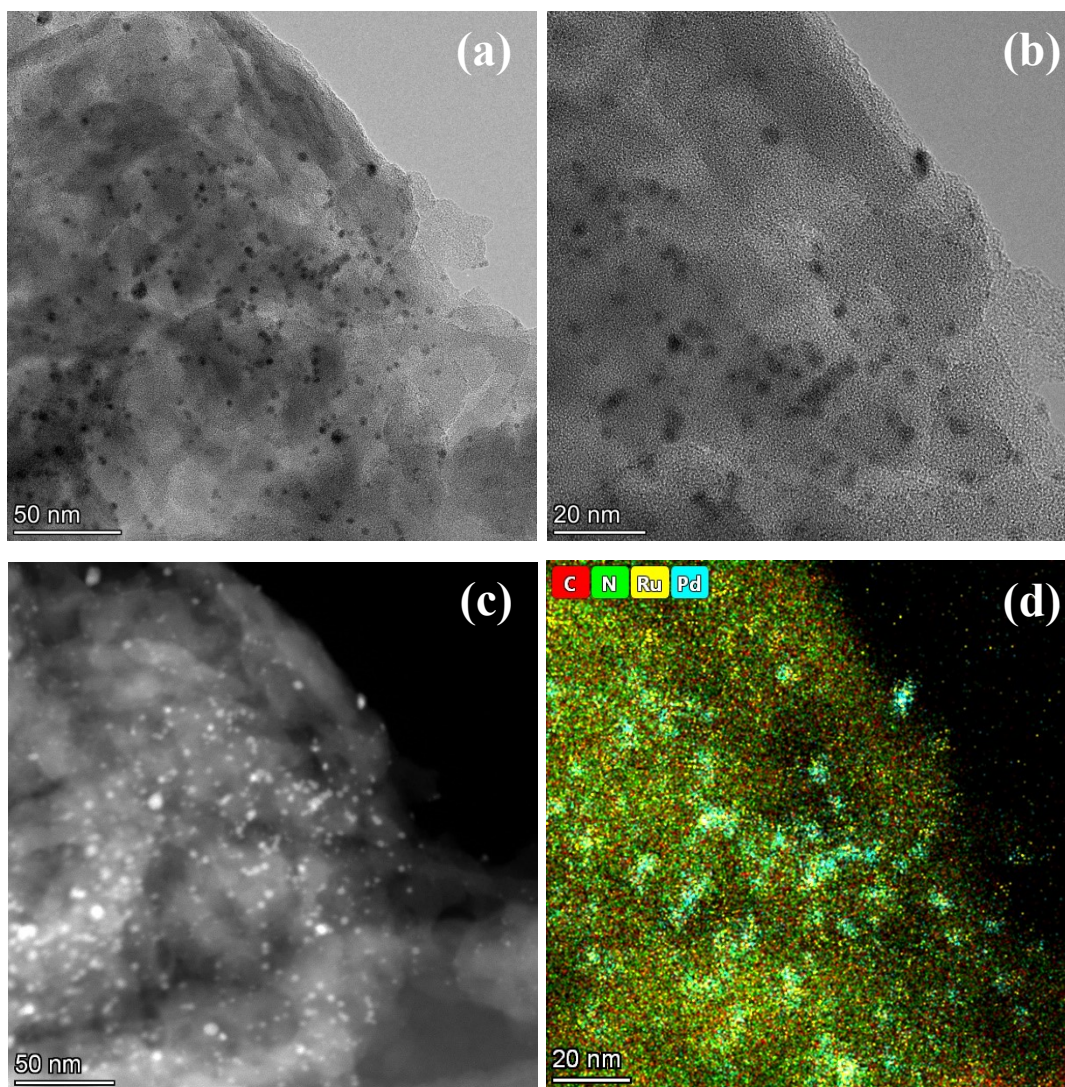

**Fig. S3.** Microstructure of 1.5%Ru-1.5%Pd/C<sub>3</sub>N<sub>4</sub>-air. (a) TEM (50 nm), (b) TEM (20 nm), (c) HAADF-STEM (50nm), (d) overall EDS element mapping.

**Table S2** XPS Fitting data of N 1s

| Catalyst                                         | C=N-C                | N-(C) <sub>3</sub> | -NH <sub>2</sub> | charge effect |
|--------------------------------------------------|----------------------|--------------------|------------------|---------------|
| C <sub>3</sub> N <sub>4</sub> -air               | 398.5 <sup>[a]</sup> | 399.9              | 401.1            | 404.2         |
|                                                  | 0.64 <sup>[b]</sup>  | 0.25               | 0.04             | 0.07          |
| 3%Ru/C <sub>3</sub> N <sub>4</sub> -air          | 398.2                | 399.9              | 401.1            | 403.4         |
|                                                  | 0.67                 | 0.24               | 0.03             | 0.07          |
| 3%Pd/C <sub>3</sub> N <sub>4</sub> -air          | 398.2                | 399.7              | 400.9            | 404.2         |
|                                                  | 0.67                 | 0.21               | 0.05             | 0.07          |
| 1.5%Ru-1.5%Pd/C <sub>3</sub> N <sub>4</sub> -air | 398.2                | 399.7              | 401.0            | 404.2         |
|                                                  | 0.63                 | 0.24               | 0.05             | 0.08          |

[a] For each catalyst, the data of first line is Binding energy (eV), BE for short.

[b] The data in second line is proportion of corresponding specie.

**Table S3** XPS Fitting data of Ru 3p

| Catalyst                                         | Ru 3p <sub>3/2</sub> |                  | Ru 3p <sub>1/2</sub> |                  | Ru <sup>0</sup> /Ru <sup>σ+</sup> |
|--------------------------------------------------|----------------------|------------------|----------------------|------------------|-----------------------------------|
|                                                  | Ru <sup>0</sup>      | Ru <sup>σ+</sup> | Ru <sup>0</sup>      | Ru <sup>σ+</sup> |                                   |
| 3%Ru/C <sub>3</sub> N <sub>4</sub> -air          | 462.3                | 465.8            | 484.5                | 487.5            | 1.96                              |
| 1.5%Ru-1.5%Pd/C <sub>3</sub> N <sub>4</sub> -air | 462.3                | 465.8            | 483.5                | 487.5            | 1.96                              |

**Table S4** XPS Fitting data of Pd 3d

| Catalyst                                         | Pd 3d <sub>5/2</sub> |                  | Pd 3d <sub>3/2</sub> |                  | Pd <sup>0</sup> /Pd <sup>2+</sup> |
|--------------------------------------------------|----------------------|------------------|----------------------|------------------|-----------------------------------|
|                                                  | Pd <sup>0</sup>      | Pd <sup>2+</sup> | Pd <sup>0</sup>      | Pd <sup>2+</sup> |                                   |
| 3%Pd/C <sub>3</sub> N <sub>4</sub> -air          | 335.4                | 337.3            | 340.6                | 342.5            | 1.32                              |
| 1.5%Ru-1.5%Pd/C <sub>3</sub> N <sub>4</sub> -air | 335.4                | 337.3            | 340.6                | 342.6            | 1.37                              |

## 2 Catalyst evaluation

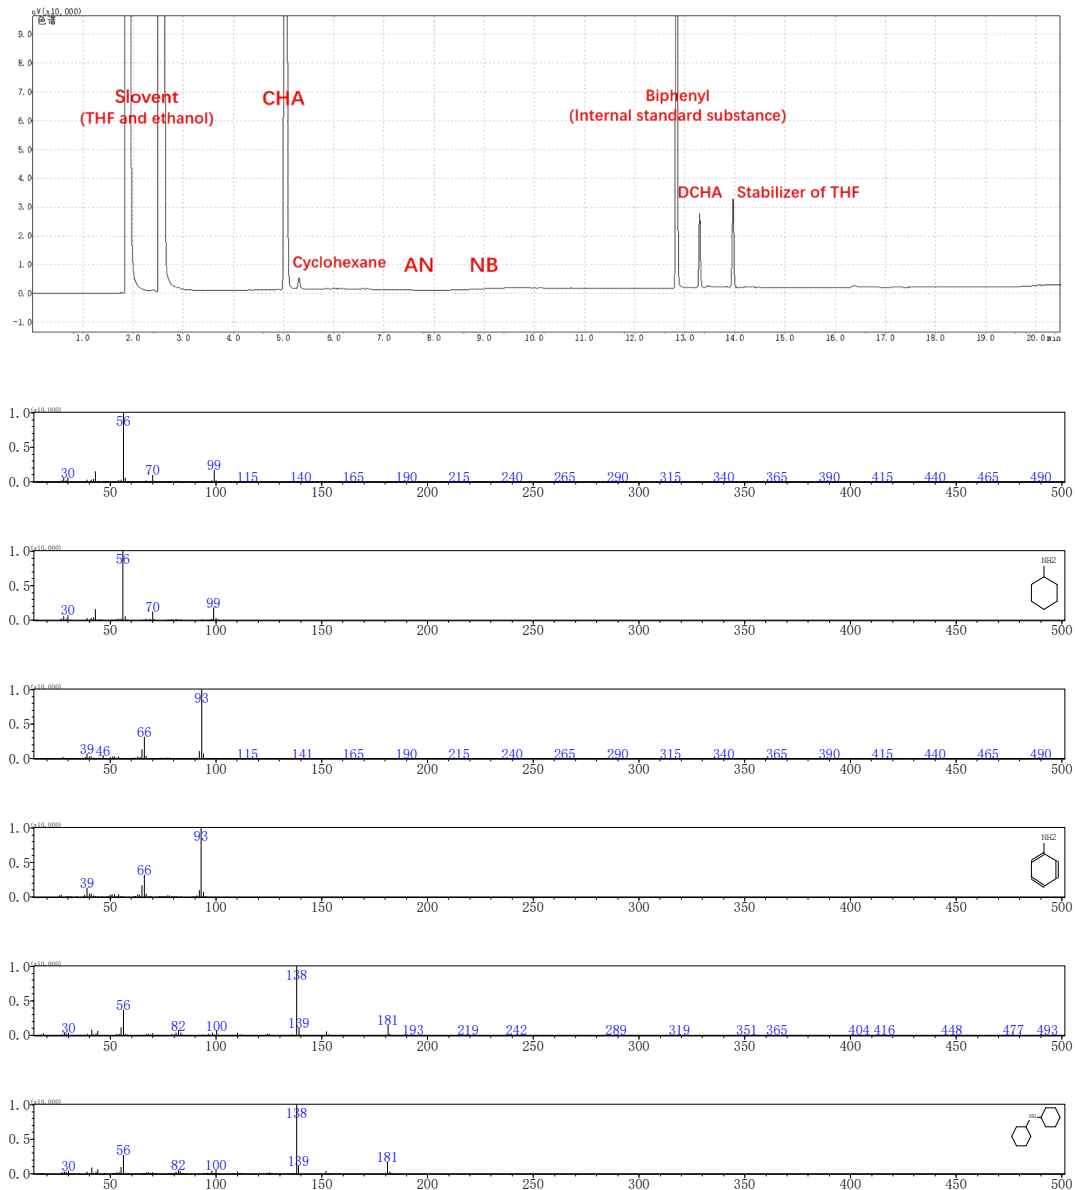

**Fig. S4.** GC-MS results and standard spectrum of NB complete hydrogenation. Reaction conditions: 1 mmol NB, 25wt.% catalysts (based on substrate), 10 mL THF, 80°C, 3 MPa H<sub>2</sub>, 3 h

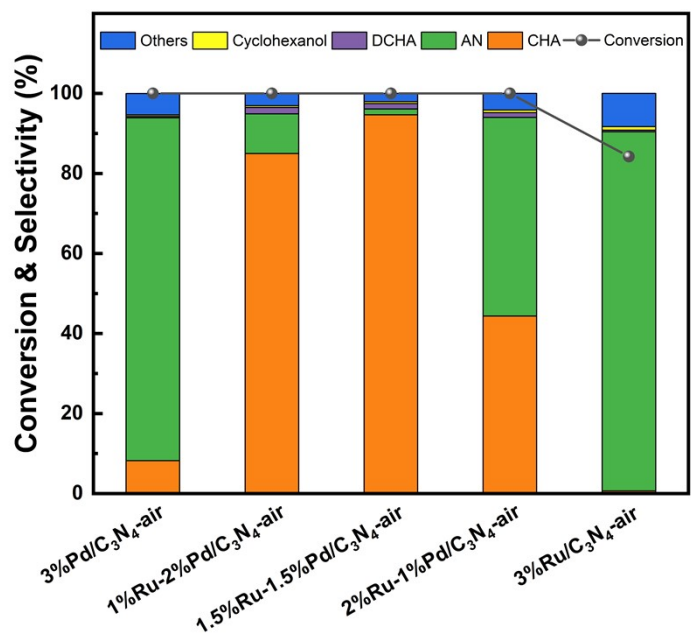

**Fig. S5.** Effect of Ru/Pd loading on NB conversion and CHA selectivity. Reaction conditions: 1 mmol NB, 25wt.% catalysts, 10 mL THF, 80 °C, 5 MPa H<sub>2</sub>, 4 h.



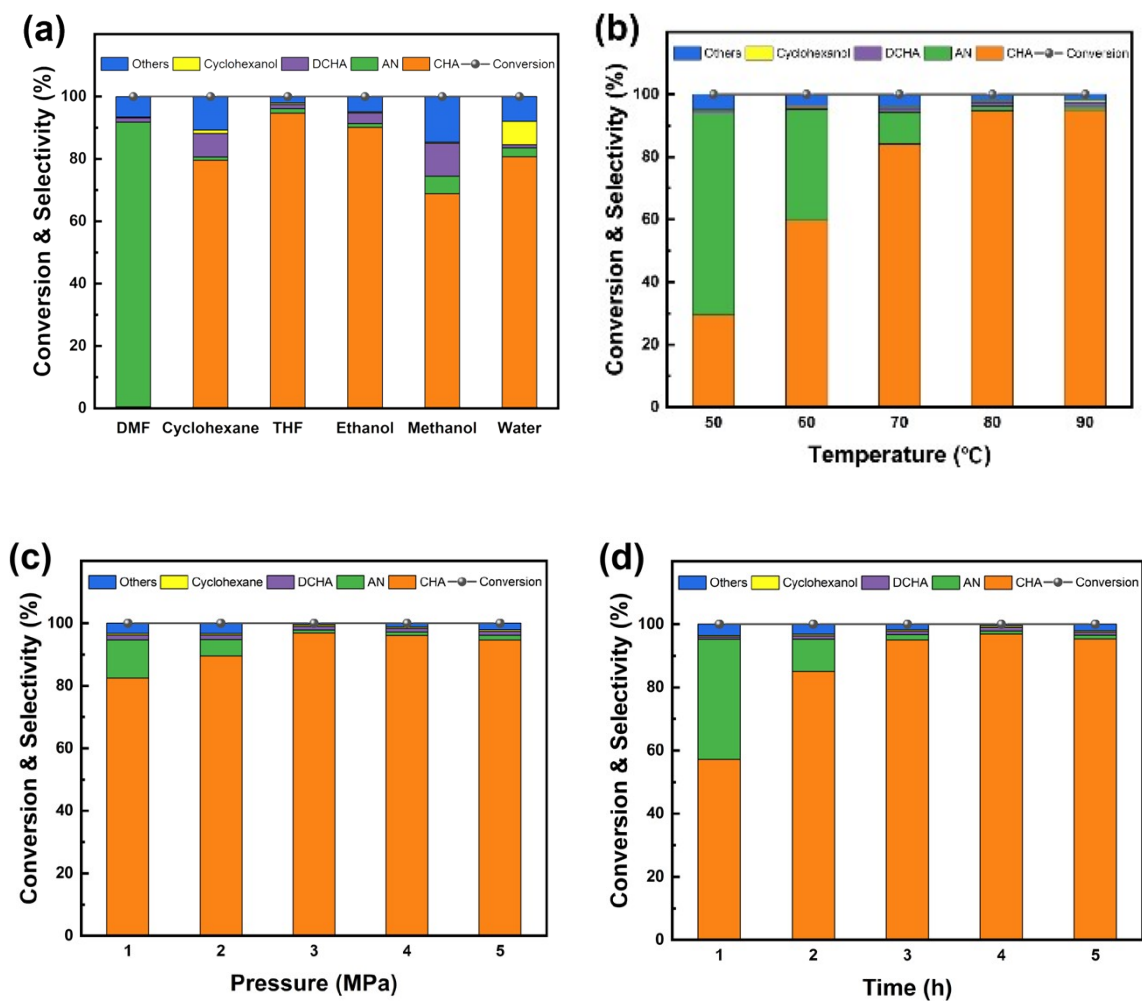

**Fig. S6.** Effects of reaction parameters on conversion and selectivity. (a) solvents (fixed reaction conditions: 10 mL solvents, 80 °C, 5 MPa H<sub>2</sub>, 4 h), (b) temperature (10 mL THF, 5 MPa H<sub>2</sub>, 4 h), (c) pressure (10 mL THF, 80 °C, 4 h), (d) time (10 mL THF, 80 °C, 3 MPa H<sub>2</sub>).

### 3 Hydrogenation mechanism

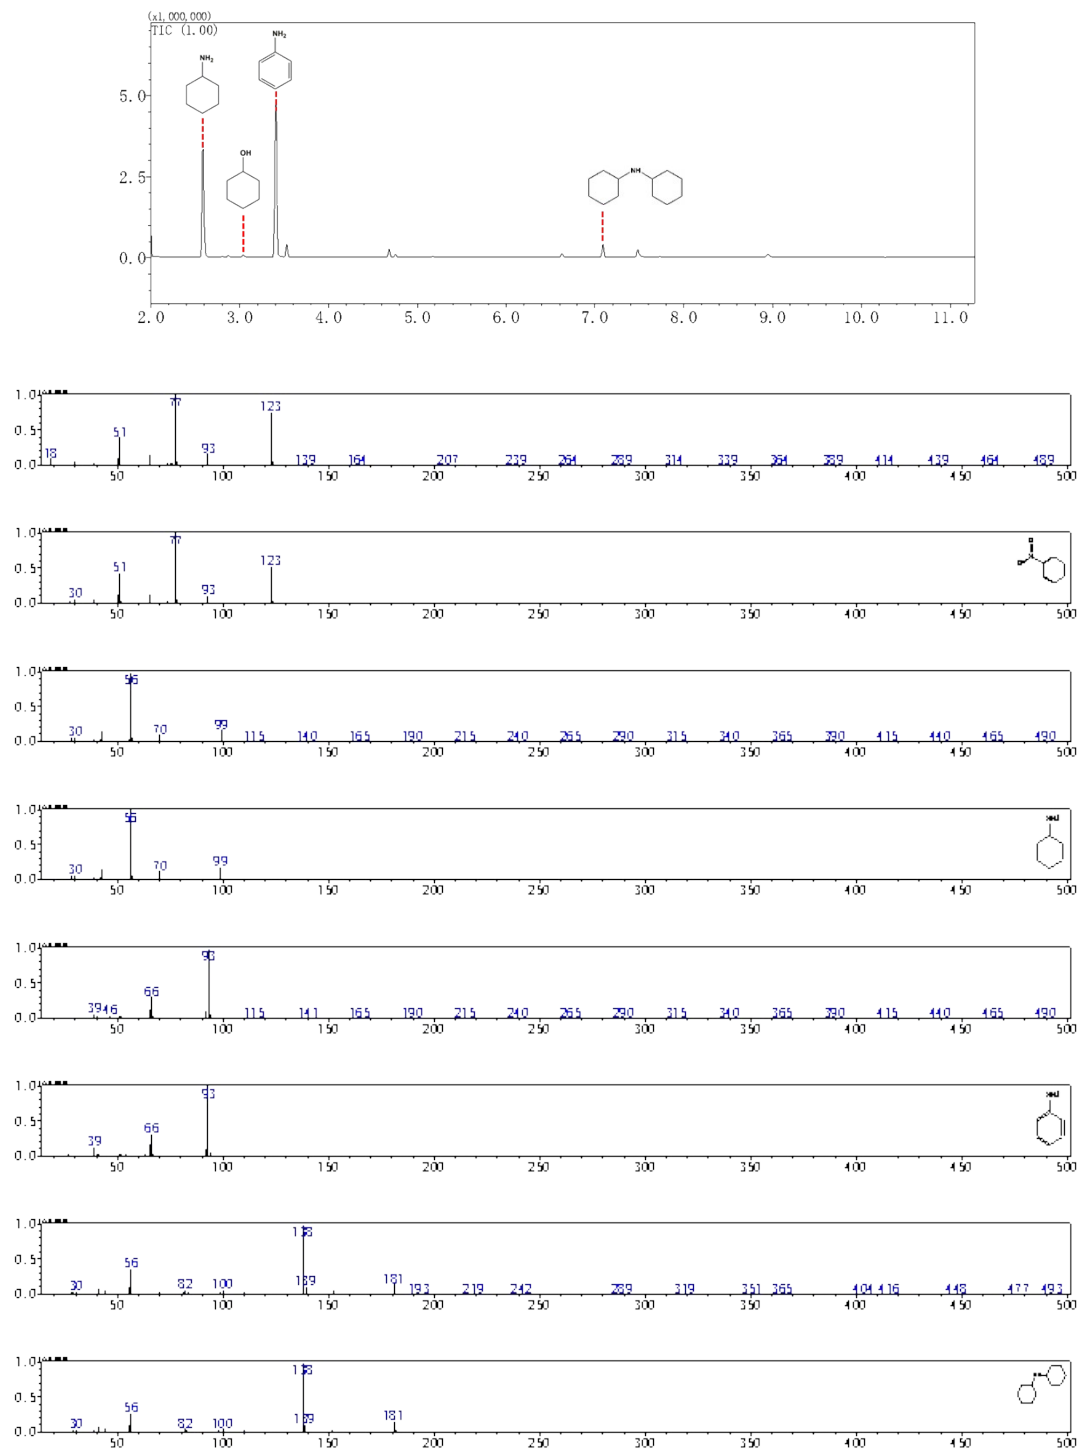

**Fig. S7.** GC-MS result and standard spectrum of incomplete hydrogenation. Reaction conditions:

1 mmol NB, 25wt.% 1.5%Ru-1.5%Pd/C<sub>3</sub>N<sub>4</sub>-air, 10 mL THF, 80°C, 3 MPa H<sub>2</sub>, 1 h.

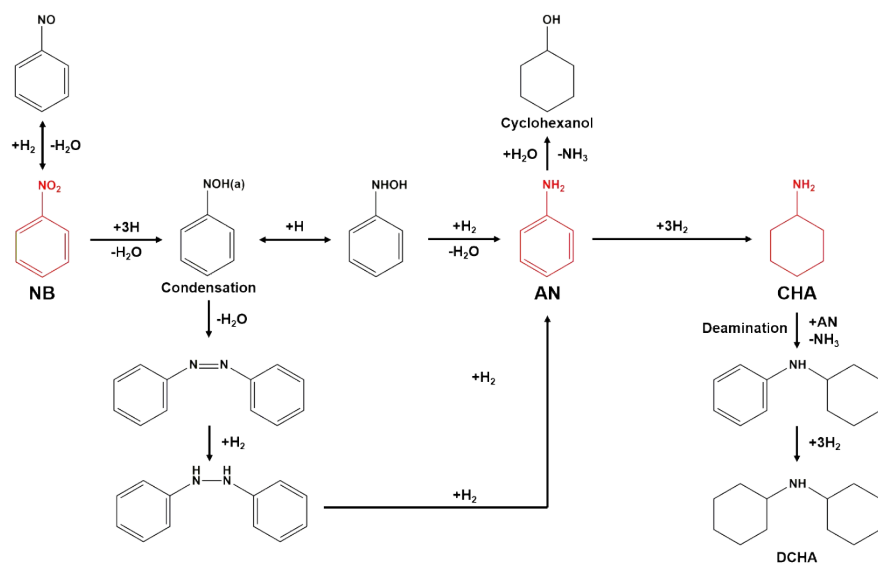

**Fig. S8.** Proposed reaction pathway of hydrogenation of NB<sup>1-3</sup>

## 4 Hydrogenation Kinetics

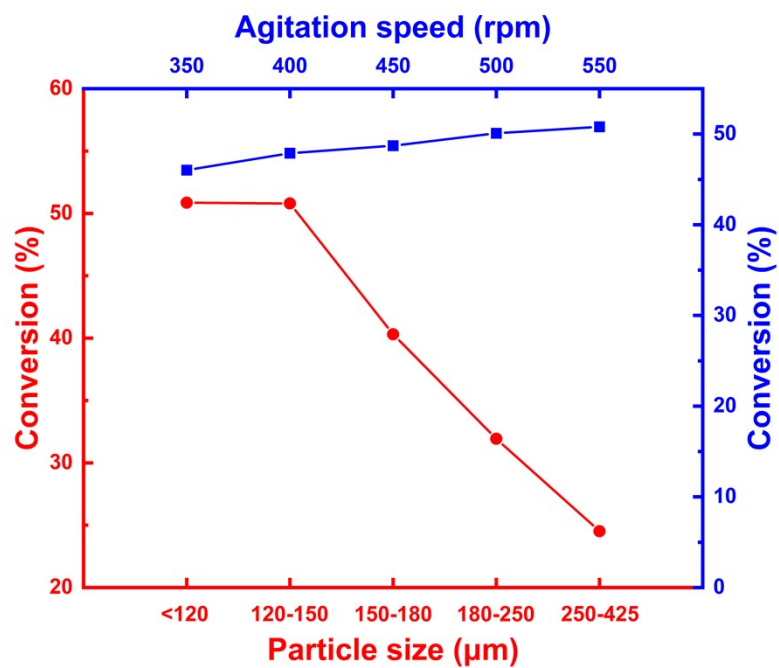

**Fig. S9.** Effect of internal (red) and external (blue) diffusion. Reaction condition: 10 mmol NB, 1 wt.% catalyst, 15 mL THF, 50 °C, 1 MPa H<sub>2</sub>, 0.5 h.

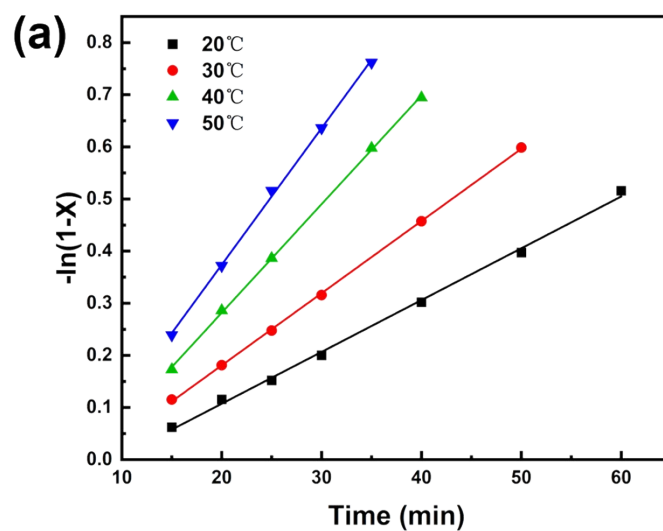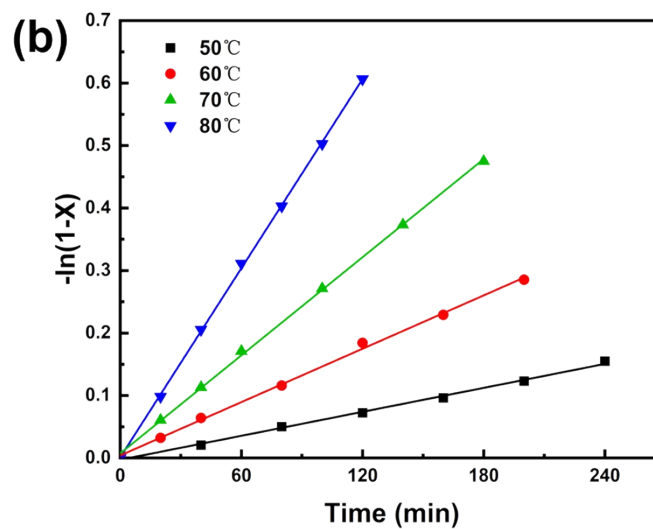

**Fig. S10.** Plots of  $-\ln(1-X)$  versus time over 1.5%Ru-1.5%Pd/C<sub>3</sub>N<sub>4</sub>-air. (a) nitrobenzene hydrogenation, (b) aniline hydrogenation.

**Table S5.** Kinetics linear fit of hydrogenation of nitrobenzene over 1.5%Ru-1.5%Pd/C<sub>3</sub>N<sub>4</sub>-air.

| Temperature °C | Linear fit equation | K (min <sup>-1</sup> ) | R <sup>2</sup> |
|----------------|---------------------|------------------------|----------------|
| 20             | y=0.0099x-0.0914    | 0.0099                 | 0.9978         |
| 30             | y=0.0138x-0.0961    | 0.0138                 | 0.9998         |
| 40             | y=0.0208x-0.1349    | 0.0208                 | 0.9996         |
| 50             | y=0.0262x-0.1502    | 0.0262                 | 0.9990         |

**Table S6.** Relevant kinetic data of hydrogenation of nitrobenzene

| Catalyst                                 | Solvent  | Temperature (°C) | Pressure (MPa) | Activation energy (kJ/mol) | References                 |
|------------------------------------------|----------|------------------|----------------|----------------------------|----------------------------|
| Ru-Pd/C <sub>3</sub> N <sub>4</sub> -air | THF      | 20-50            | 1.0            | 26.26 <sup>this work</sup> | -                          |
| Ru/NC                                    | Methanol | 20-50            | 2.0            | 43.70                      | Yang et al. <sup>4</sup>   |
| Pd/Al <sub>2</sub> O <sub>3</sub>        | Methanol | 31-46            | 1.3            | 40.90                      | Duan et al. <sup>5</sup>   |
| Pd/P123                                  | Water    | 30-75            | 3.0            | 40.18                      | Huang et al. <sup>6</sup>  |
| Ni/SiO <sub>2</sub>                      | Water    | 50-250           | 0.5-5.0        | 35.10                      | Relvas et al. <sup>7</sup> |
| CuNiCr/kieselguhr                        | None     | 230-290          | 0.1            | 43.39                      | Petrov et al. <sup>8</sup> |
| Au/ZrO <sub>2</sub>                      | Ethanol  | 25-50            | 4.0            | 67.20                      | Gomez et al. <sup>9</sup>  |

**Table S7.** Kinetics linear fit of hydrogenation of aniline over 1.5%Ru-1.5%Pd/C<sub>3</sub>N<sub>4</sub>-air

| Temperature °C | Linear fit equation | k (min <sup>-1</sup> ) | R <sup>2</sup> |
|----------------|---------------------|------------------------|----------------|
| 50             | y=0.0006x-0.0028    | 0.0006                 | 0.9971         |
| 60             | y=0.0014x+0.0040    | 0.0014                 | 0.9980         |
| 70             | y=0.0026x+0.0073    | 0.0026                 | 0.9993         |
| 80             | y=0.0050x+0.0011    | 0.0050                 | 0.9997         |



**Table S8.** Relevant kinetic data of hydrogenation of aniline

| Catalyst                                 | Solvent                         | Temperature (°C) | Pressure (MPa) | Activation energy (kJ/mol) | References                |
|------------------------------------------|---------------------------------|------------------|----------------|----------------------------|---------------------------|
| Ru-Pd/C <sub>3</sub> N <sub>4</sub> -air | THF                             | 20-50            | 3.0            | 66.3 <sup>this work</sup>  | -                         |
| Ni powder                                | None                            | 160-200          | 1.0-10.0       | 72.0                       | Mink et al. <sup>10</sup> |
| Ni/Si/Al                                 | None                            | 150-200          | 6.0-10.0       | 62.0                       | Mink et al. <sup>10</sup> |
| Ru/Al <sub>2</sub> O <sub>3</sub>        | Cyclohexane and water two-phase | 105-145          | 4.8            | 50.4                       | Roy et al. <sup>11</sup>  |

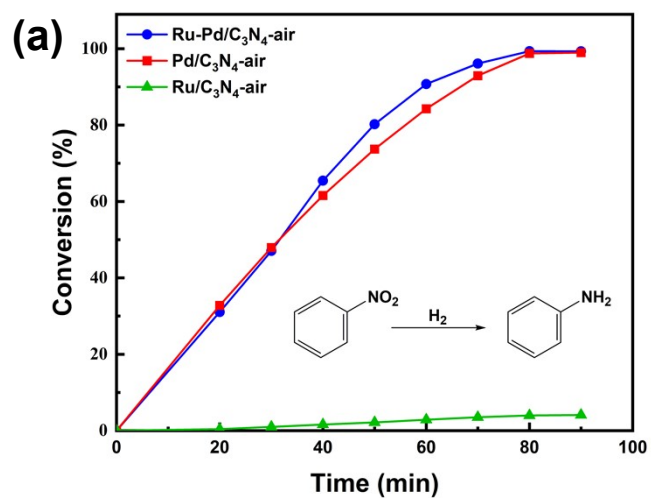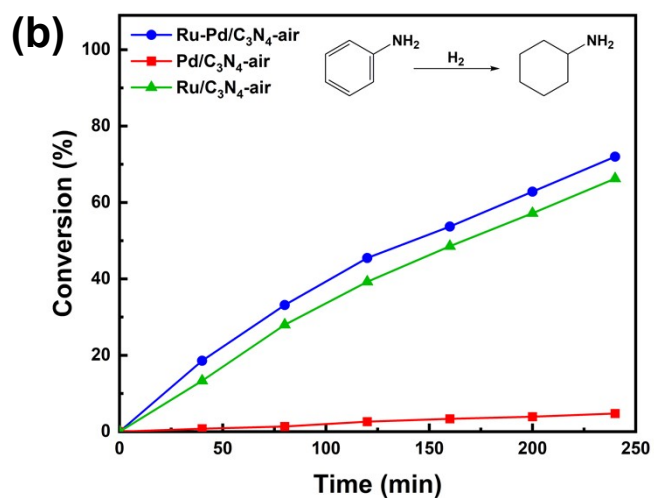

**Fig. S11.** (a) NB conversion vs. Time over 1.5%Ru-1.5%Pd/C<sub>3</sub>N<sub>4</sub>-air, 3%Ru/C<sub>3</sub>N<sub>4</sub>-air, and 3%Pd/C<sub>3</sub>N<sub>4</sub>-air. Reaction conditions: 70 mmol NB, 1wt.% catalyst, 105 mL THF, 50 °C, 1 MPa

H<sub>2</sub>. (b) NB conversion vs. Time over 1.5%Ru-1.5%Pd/C<sub>3</sub>N<sub>4</sub>-air, 3%Ru/C<sub>3</sub>N<sub>4</sub>-air, and 3%Pd/C<sub>3</sub>N<sub>4</sub>-air. Reaction condition: 10 mmol AN, 25wt.% catalyst, 100 mL THF, 80 °C, 3 MPa

H<sub>2</sub>.

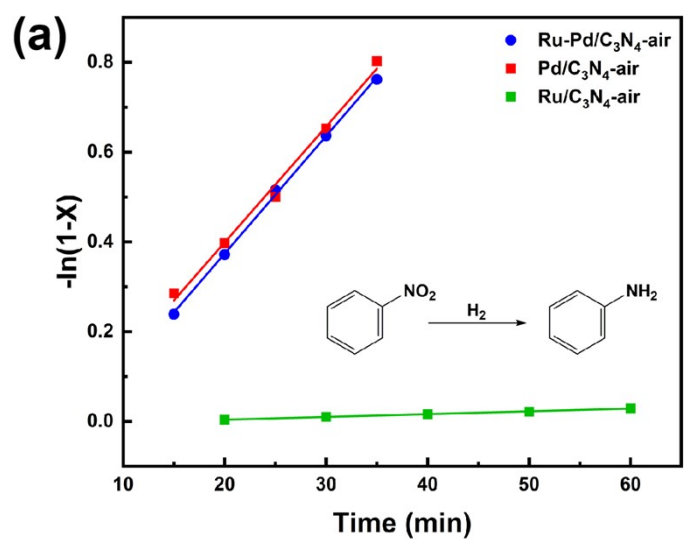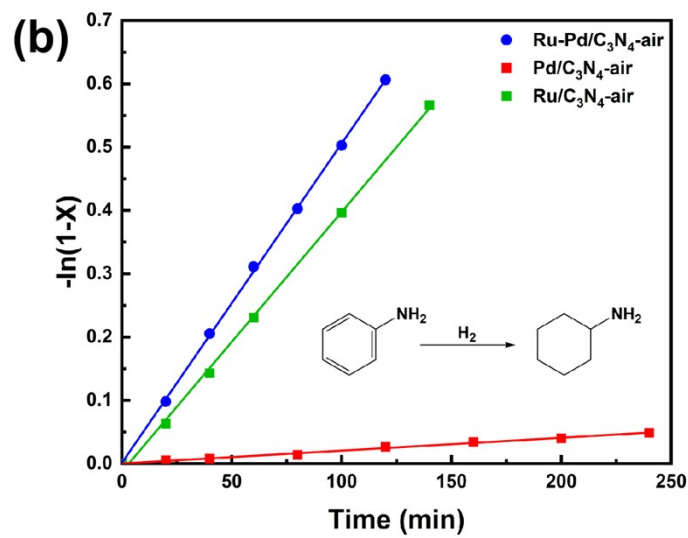

**Fig. S12.** Plots of  $-\ln(1-X)$  versus time over different catalysts. (a) nitrobenzene hydrogenation, (b) aniline hydrogenation.

**Table S9.** Kinetics linear fit of hydrogenation of nitrobenzene over different catalysts

| Catalyst                                         | Linear fit equation | k (min <sup>-1</sup> ) | R <sup>2</sup> |
|--------------------------------------------------|---------------------|------------------------|----------------|
| 1.5%Ru-1.5%Pd/C <sub>3</sub> N <sub>4</sub> -air | y=0.0262x-0.1502    | 0.0262                 | 0.9990         |
| 3%Pd/C <sub>3</sub> N <sub>4</sub> -air          | y=0.0258x-0.1176    | 0.0258                 | 0.9922         |
| 3%Ru /C <sub>3</sub> N <sub>4</sub> -air         | y=0.0006x-0.0087    | 0.0006                 | 0.9979         |

**Table S10.** Kinetics linear fit of hydrogenation of aniline over different catalysts

| Catalyst                                         | Linear fit equation | k (min <sup>-1</sup> ) | R <sup>2</sup> |
|--------------------------------------------------|---------------------|------------------------|----------------|
| 1.5%Ru-1.5%Pd/C <sub>3</sub> N <sub>4</sub> -air | y=0.0050x+0.0011    | 0.0050                 | 0.9997         |
| 3%Pd/C <sub>3</sub> N <sub>4</sub> -air          | y=0.0002x+0.0001    | 0.0002                 | 0.9934         |
| 3%Ru/C <sub>3</sub> N <sub>4</sub> -air          | y=0.0041x-0.0128    | 0.0041                 | 0.9987         |

## 5 Catalyst recyclability and versatility

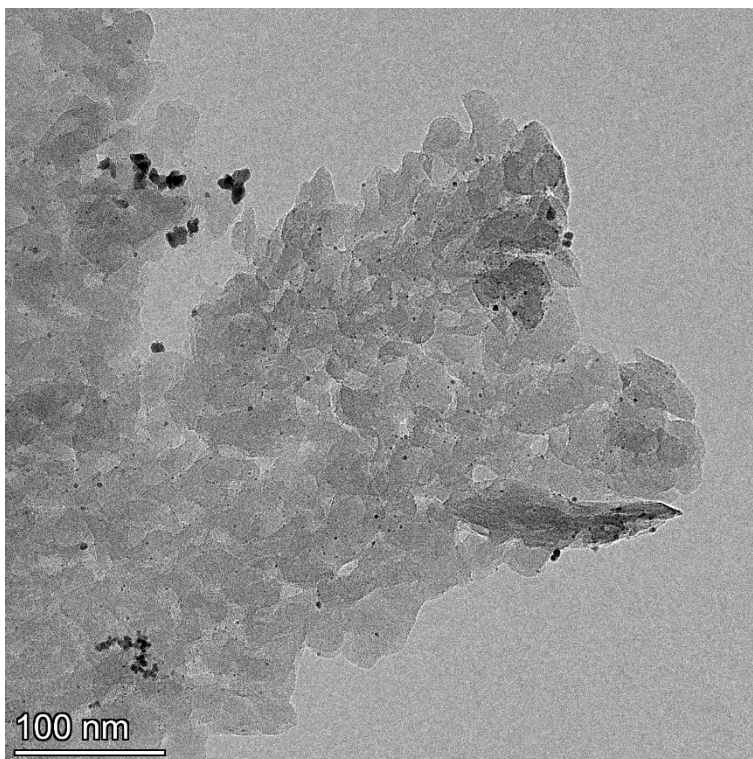

**Fig. S13.** TEM images of recycled 1.5%Ru-1.5%Pd/C<sub>3</sub>N<sub>4</sub>-air

## Nitrobenzene (GC characteristic peaks):

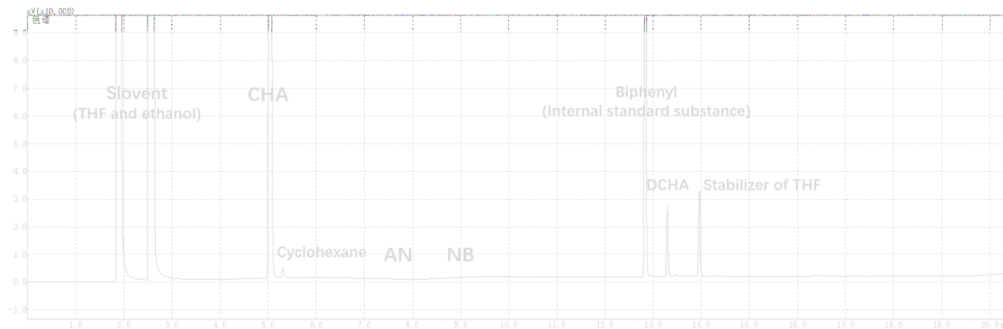

## o-nitrotoluene:

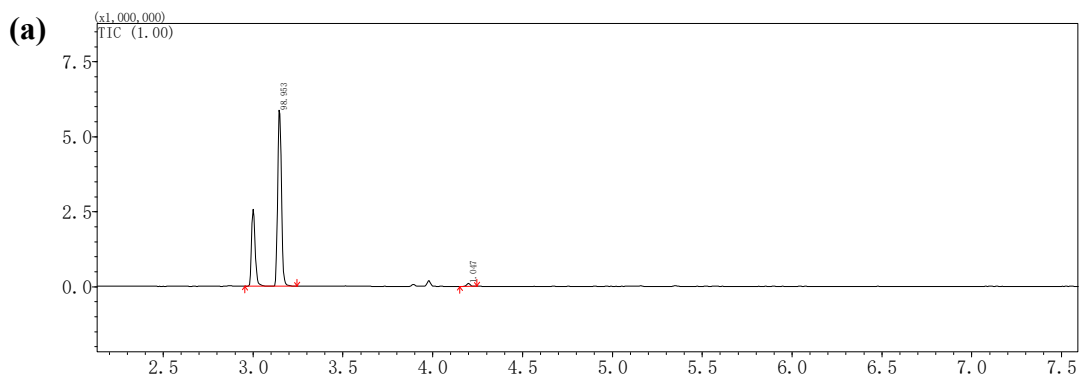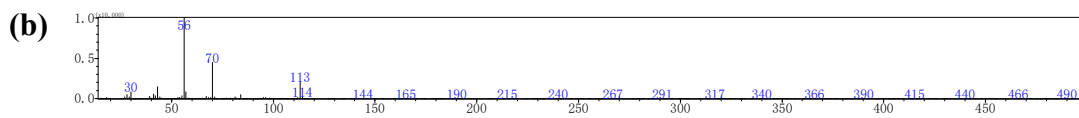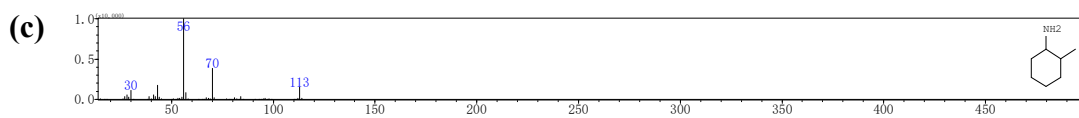

## m-nitrotoluene:

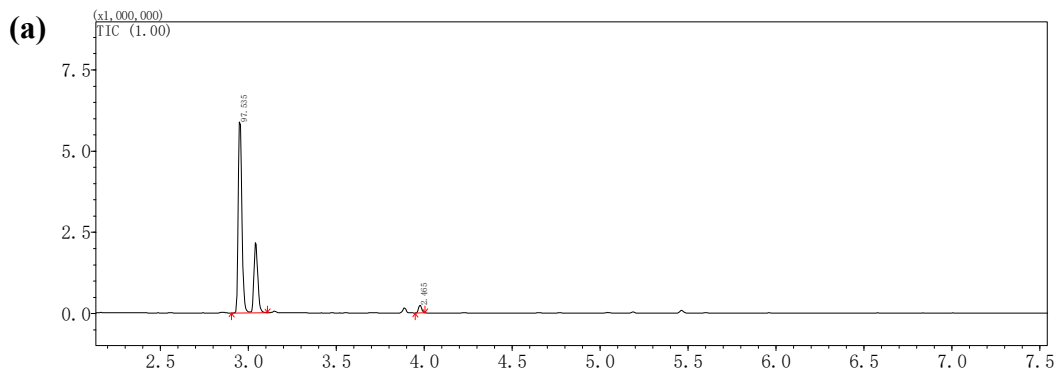

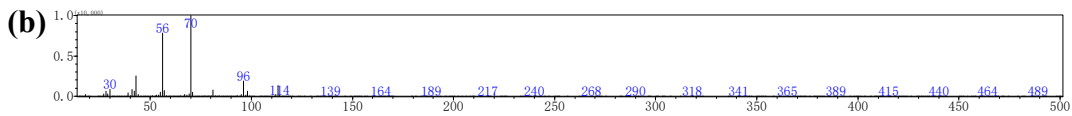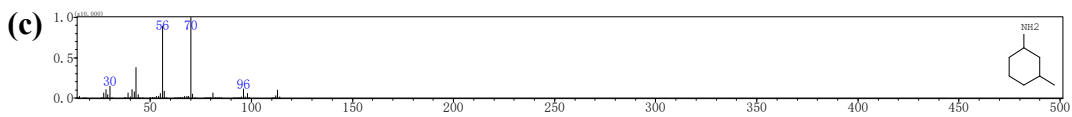

**p-nitrotoluene:**

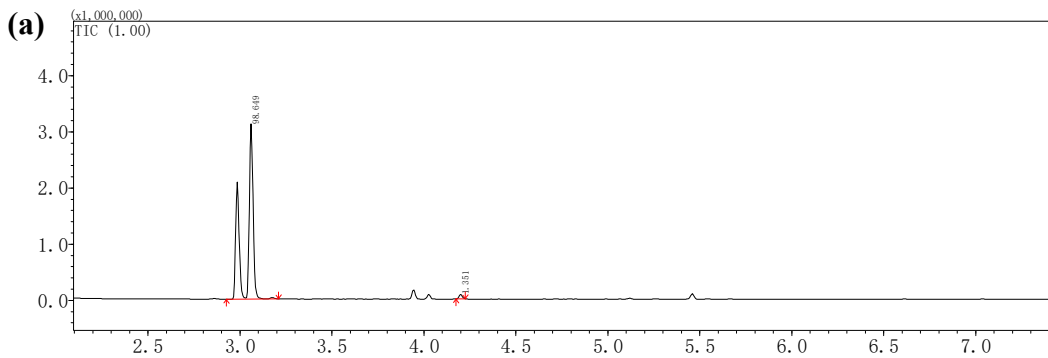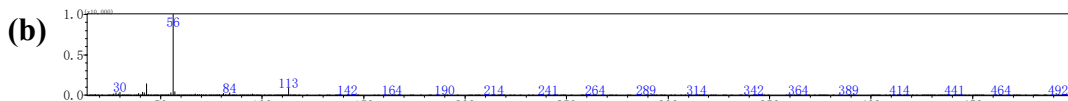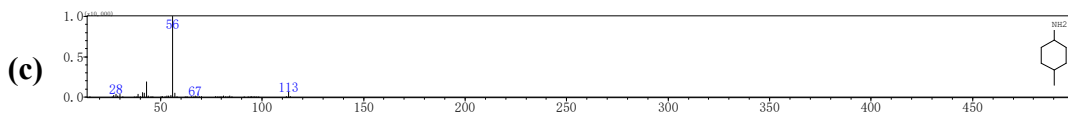

**2-ethylnitrobenzene:**

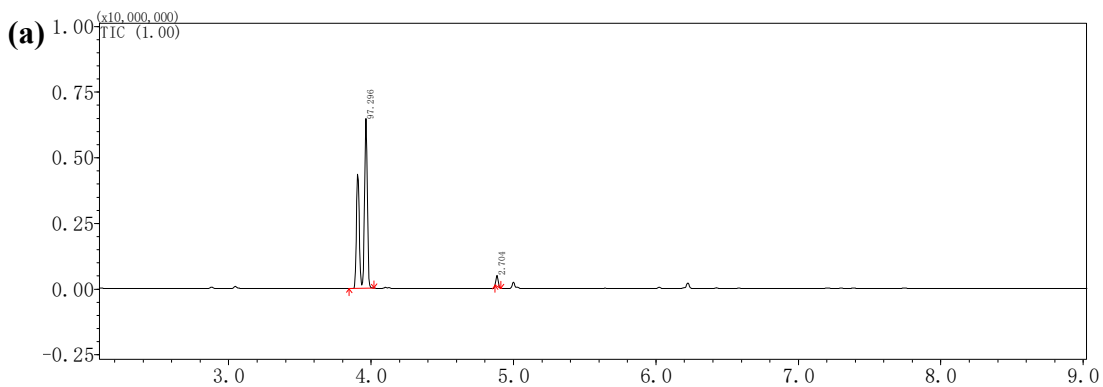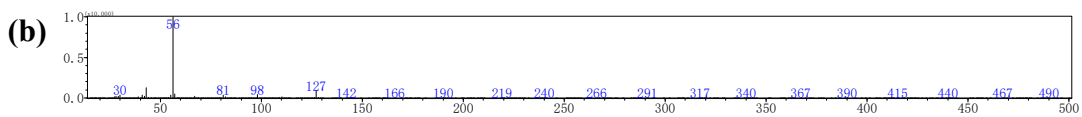

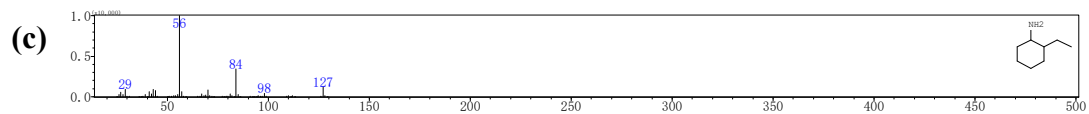

### 2,6-dimethyl-nitrobenzene:

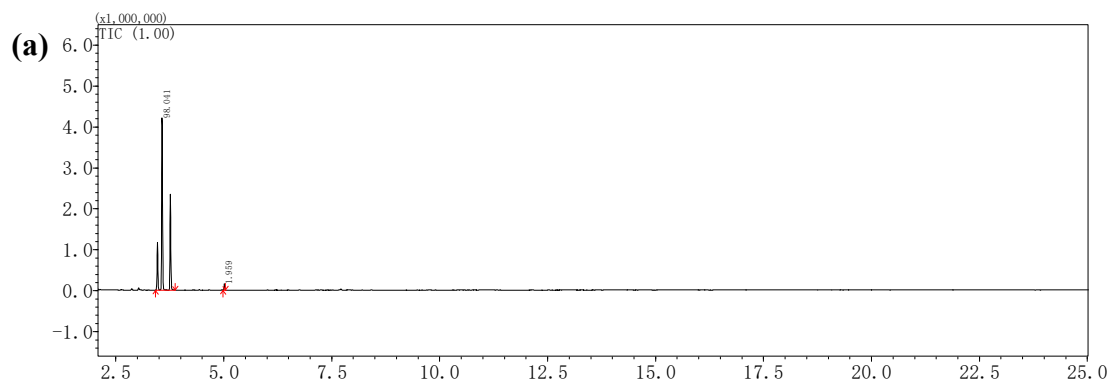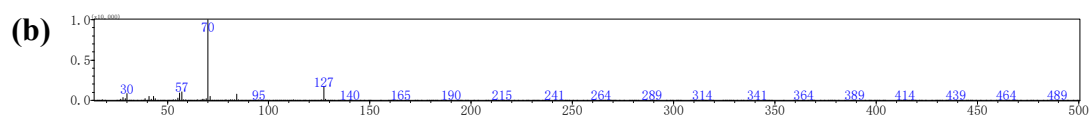

### 2-nitrophenol:

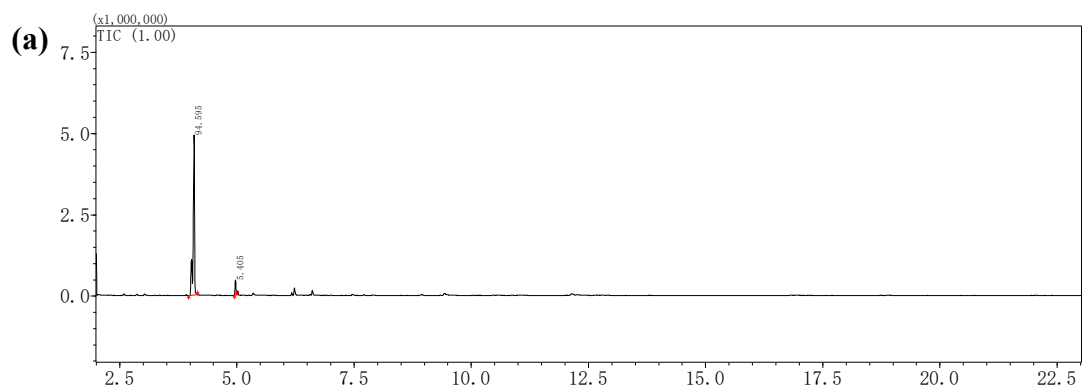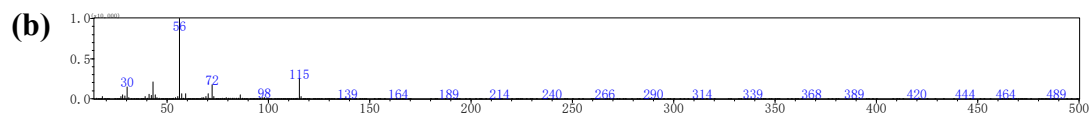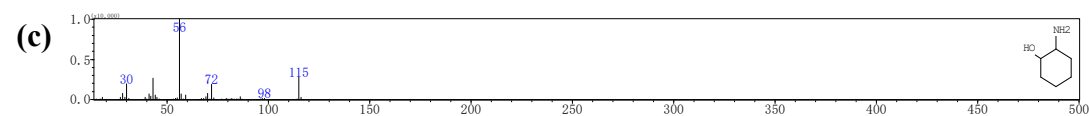

### 4-nitrophenol:



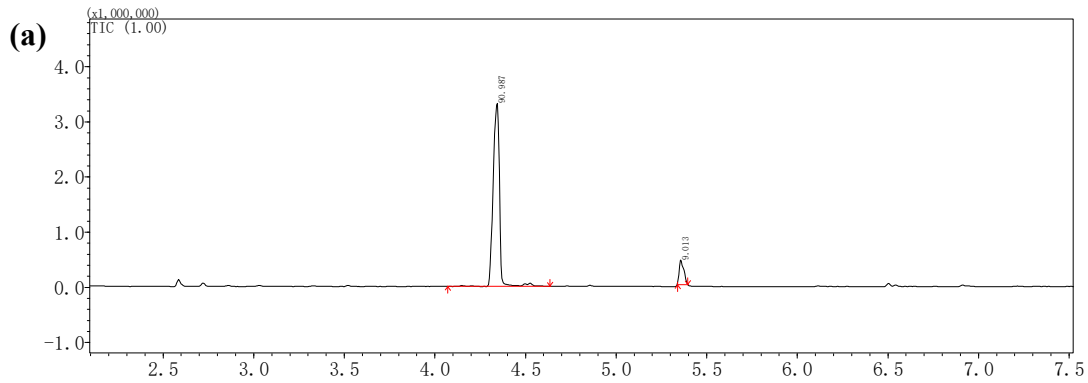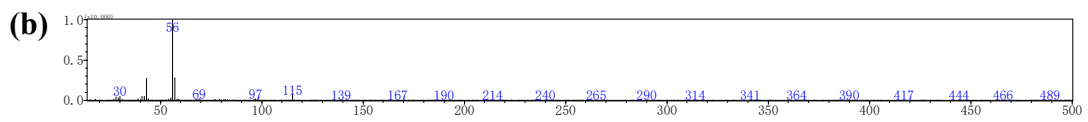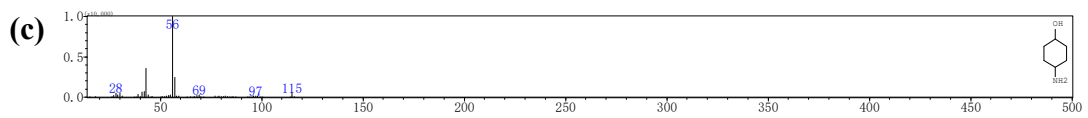

### 3-nitroaniline:

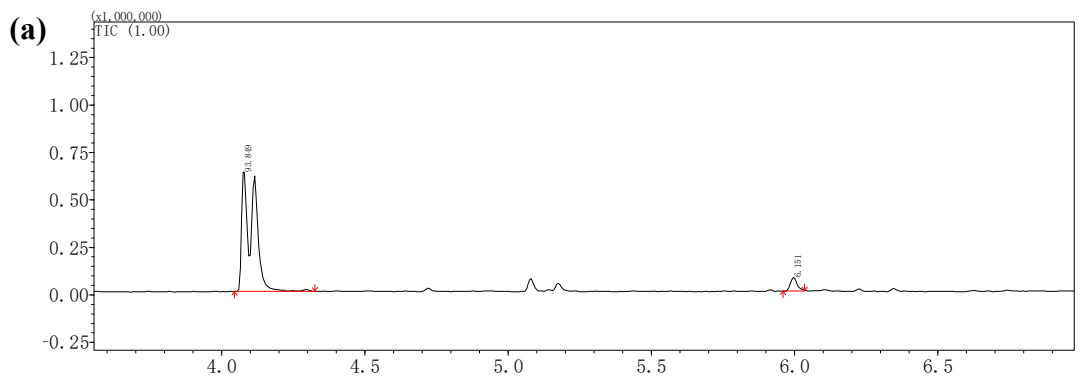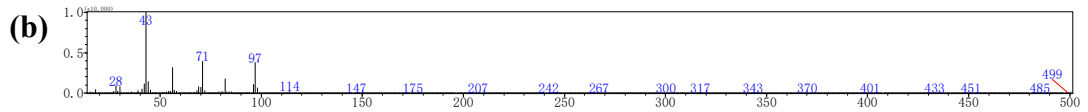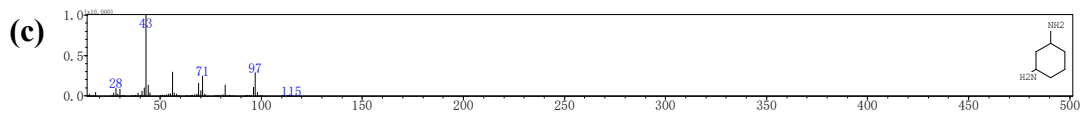

### 4-nitroaniline:

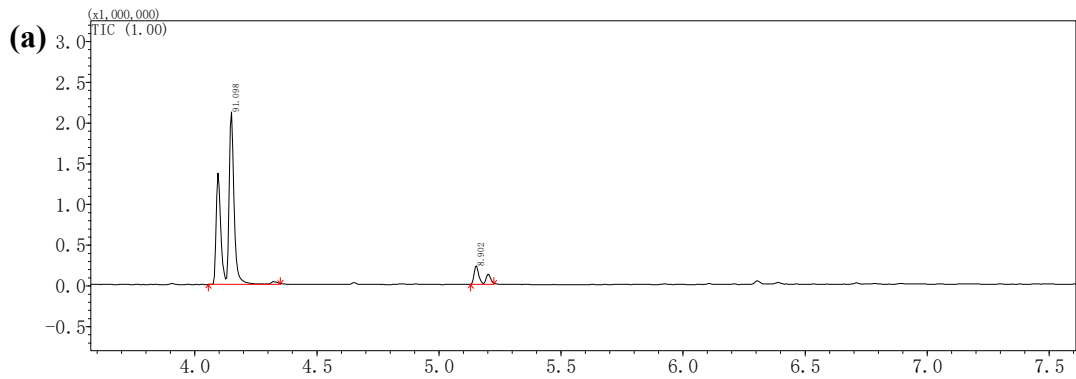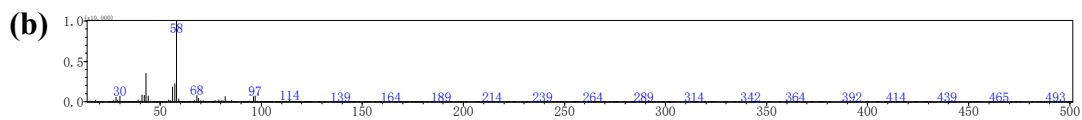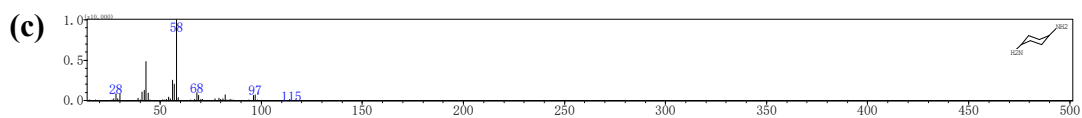

### 3-nitrochlorobenzene:

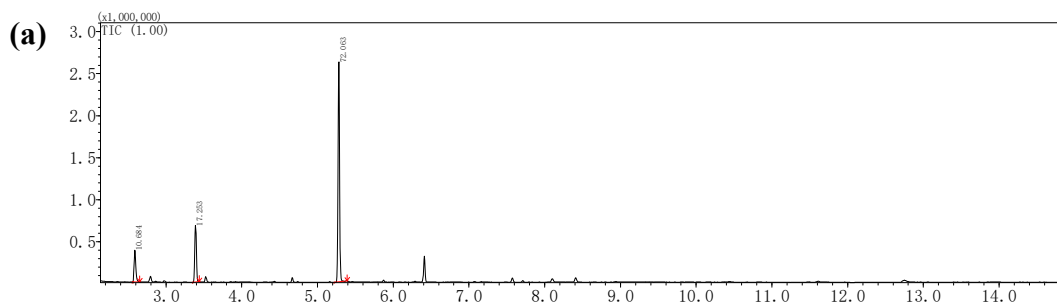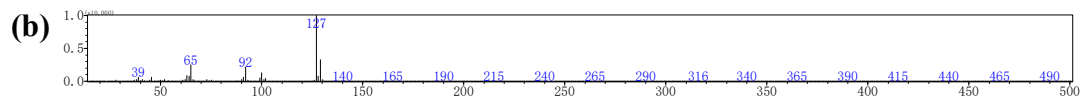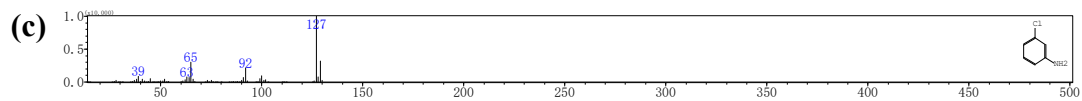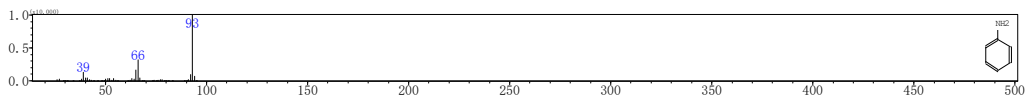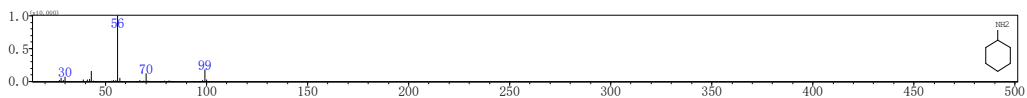

### 4-nitrobenzoic acid:

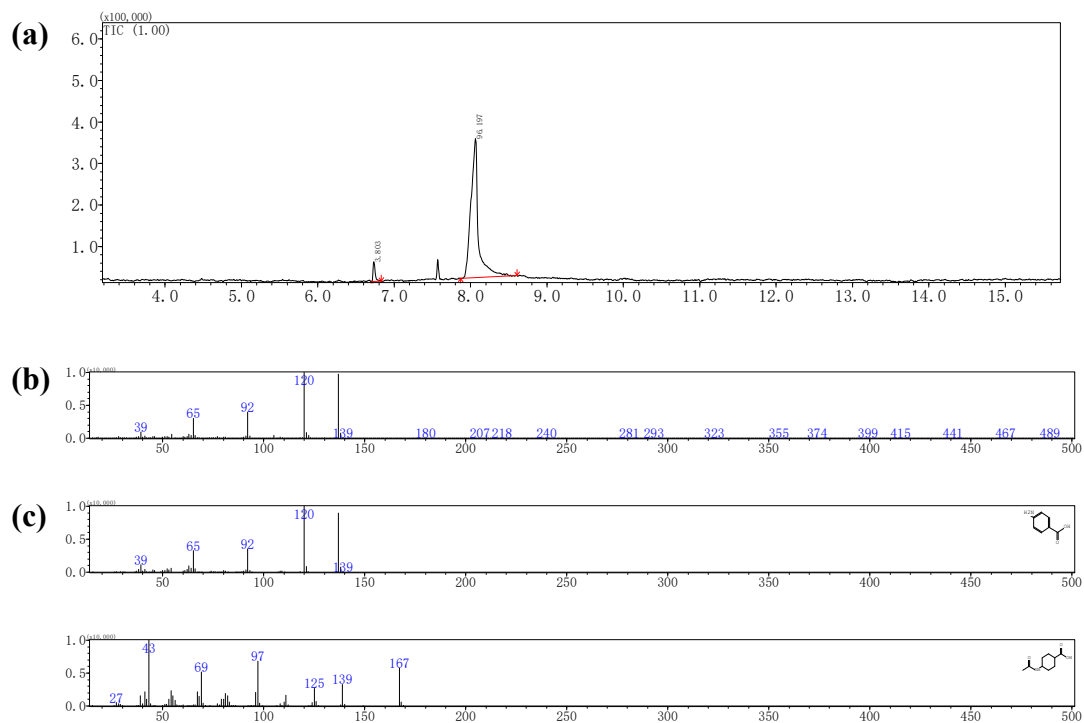

**Fig. S14.** Original results of GC-MS. (a) GC-MS characteristic peaks, (b) detected fragment peaks, (c) fragment peak in database.

## Reference

1. P. Tomkins, E. Gebauer-Henke, W. Leitner and T. E. Mueller, *ACS Catalysis*, 2015, **5**, 203-209.
2. X. Li, Z. Wang, S. Mao, Y. Chen, M. Tang, H. Li and Y. Wang, *Chinese Journal Of Chemistry*, 2018, **36**, 1191-1196.
3. E. A. Gelder, S. D. Jackson and C. M. Lok, *Chemical Communications*, 2005, DOI: 10.1039/B411603H, 522-524.
4. H. Yang, L. Wang, S. Xu, X. Hui, Y. Cao, P. He, Y. Li and H. Li, *Chemical Engineering Journal*, 2022, **431**, 133863.
5. X. Duan, J. Tu, A. R. Teixeira, L. Sang, K. F. Jensen and J. Zhang, *Reaction Chemistry & Engineering*, 2020, **5**, 1751-1758.
6. C. Huang, X. Wang, F. Yu, B. Yuan, C. Xie and S. Yu, *Research on Chemical Intermediates*, 2018, **44**, 13-26.
7. J. Relvas, R. Andrade, F. G. Freire, F. Lemos, P. Araújo, M. J. Pinho, C. P. Nunes and F. R. Ribeiro, *Catalysis Today*, 2008, **133-135**, 828-835.
8. L. Petrov, K. Kumbilieva and N. Kirkov, *Applied Catalysis*, 1990, **59**, 31-43.
9. S. Gomez, C. Torres, J. L. G. Fierro, C. R. Apesteguia and P. Reyes, *Journal of the Chilean Chemical Society*, 2012, **57**, 1194-1198.
10. G. Mink and L. Horvath, *Reaction Kinetics And Catalysis Letters*, 1998, **65**, 59-65.
11. D. Roy and R. V. Chaudhari, *Ind. Eng. Chem. Res.*, 2005, **44**, 9586-9593.
